# Supplementary material for: Genetic Potential and Inheritance Patterns of Physiological, Agronomic and Quality Traits in Bread Wheat under Normal and Water Deficit Conditions
Source: MDPI journal article supplement (doi:10.3390/plants11070952), 2022-03-31
Supplement: s1 [file s1]

**Table S1.** Code, name, pedigree and source of the eight parental wheat genotypes used in the present study.

| Name        | Code           | Pedigree                                                                                                    | Source        |
|-------------|----------------|-------------------------------------------------------------------------------------------------------------|---------------|
| Gemmeiza-12 | P <sub>1</sub> | OTUS /3/ SARA / THB // VEE                                                                                  | ARC-Egypt     |
| Sids-12     | P <sub>2</sub> | BUC // 7C / ALD /5/ MAYA74 / ON // 1160.147 /3/ BB /<br>GLL /4/ CHAT"S" /6/ MAYA / VUL // CMH74A.630 / 4*SX | ARC-Egypt     |
| Misr-2      | P <sub>3</sub> | SKAUZ / BAV92                                                                                               | ARC-Egypt     |
| Line-144    | P <sub>4</sub> | BAJ #1                                                                                                      | CIMMYT-Mexico |
| Line-128    | P <sub>5</sub> | SOKOLL/3/PASTOR//HXL7573/2*BAU/4/SRMA/TUI                                                                   | CIMMYT-Mexico |
| Sahel-1     | P <sub>6</sub> | NS 732/PIMA//Veery'S                                                                                        | ICARDA        |
| Gemmeiza-7  | P <sub>7</sub> | CMH 74A.630 / 5X // SERI 82 /3/ AGENT                                                                       | ARC-Egypt     |
| Line-121    | P <sub>8</sub> | CHEN/AE.SQ//2*OPATA/3/FINSI                                                                                 | CIMMYT-Mexico |

**Table S2.** Main soil physico-chemical analysis before wheat cultivation at the experimental site.

| Depth (cm) | Sand (%) | Silt (%)                              | Clay (%) | texture                               | θ <sub>s</sub> (%) | LL (%)                                | DUL (%) | OC (%)    | qb<br>(g cm <sup>-3</sup> ) | Ks<br>(cm h <sup>-1</sup> ) |
|------------|----------|---------------------------------------|----------|---------------------------------------|--------------------|---------------------------------------|---------|-----------|-----------------------------|-----------------------------|
| 0-20       | 16.0     | 30.1                                  | 53.9     | clay                                  | 62.7               | 22.0                                  | 40.6    | 0.8       | 1.20                        | 0.40                        |
| 20-40      | 15.5     | 32.5                                  | 52.0     | Clay                                  | 65.2               | 21.5                                  | 40.5    | 0.7       | 1.22                        | 0.38                        |
| 40-60      | 14.5     | 37.0                                  | 48.5     | clay                                  | 65.5               | 21.0                                  | 41.2    | 0.5       | 1.23                        | 0.31                        |
| pH         |          | Available N<br>(mg kg <sup>-1</sup> ) |          | Available P<br>(mg kg <sup>-1</sup> ) |                    | Available K<br>(mg kg <sup>-1</sup> ) |         | OM<br>(%) |                             |                             |
| 0-20       | 8.0      | 35.2                                  |          | 10.5                                  |                    | 620                                   |         | 1.37      |                             |                             |
| 20-40      | 7.8      | 32.5                                  |          | 9.5                                   |                    | 602                                   |         | 1.21      |                             |                             |
| 40-60      | 8.2      | 28.9                                  |          | 9.2                                   |                    | 585                                   |         | 0.86      |                             |                             |

θ<sub>s</sub>: saturation percentage (%), LL: wilting point (%), DUL: field capacity (%), OC: organic carbon (%),  
qb: bulk density, K<sub>s</sub>: saturated hydraulic conductivity, OM: organic matter

**Table S3.** Drought tolerance indices for wheat parental genotypes and their corresponding F1s crosses.

| Gen   | Geometric mean productivity (GMP) | Mean productivity (MP) | Yield index (YI) | Stress tolerance index (STI) |
|-------|-----------------------------------|------------------------|------------------|------------------------------|
| P1    | 24.92                             | 25.43                  | 0.91             | 0.70                         |
| P2    | 24.58                             | 24.83                  | 0.96             | 0.68                         |
| P3    | 28.87                             | 29.13                  | 1.13             | 0.94                         |
| P4    | 26.60                             | 26.90                  | 1.03             | 0.80                         |
| P5    | 20.67                             | 21.03                  | 0.77             | 0.48                         |
| P6    | 25.28                             | 25.42                  | 1.02             | 0.72                         |
| P7    | 20.98                             | 21.33                  | 0.78             | 0.49                         |
| P8    | 28.46                             | 28.63                  | 1.14             | 0.91                         |
| P1×P2 | 25.91                             | 26.54                  | 0.93             | 0.75                         |
| P1×P3 | 26.42                             | 26.69                  | 1.03             | 0.79                         |
| P1×P4 | 27.37                             | 27.72                  | 1.05             | 0.84                         |
| P1×P5 | 27.28                             | 27.83                  | 1.00             | 0.84                         |
| P1×P6 | 24.79                             | 25.00                  | 0.98             | 0.69                         |
| P1×P7 | 19.97                             | 20.47                  | 0.72             | 0.45                         |
| P1×P8 | 28.18                             | 28.90                  | 1.01             | 0.89                         |
| P2×P3 | 19.83                             | 20.47                  | 0.69             | 0.44                         |
| P2×P4 | 29.04                             | 29.50                  | 1.09             | 0.95                         |
| P2×P5 | 24.56                             | 25.00                  | 0.91             | 0.68                         |
| P2×P6 | 23.19                             | 23.36                  | 0.92             | 0.60                         |
| P2×P7 | 20.74                             | 20.90                  | 0.82             | 0.48                         |
| P2×P8 | 27.18                             | 27.50                  | 1.05             | 0.83                         |
| P3×P4 | 25.73                             | 25.85                  | 1.05             | 0.74                         |
| P3×P5 | 30.06                             | 30.28                  | 1.20             | 1.02                         |
| P3×P6 | 27.26                             | 27.44                  | 1.09             | 0.84                         |
| P3×P7 | 25.97                             | 26.51                  | 0.95             | 0.76                         |
| P3×P8 | 34.15                             | 34.31                  | 1.39             | 1.31                         |
| P4×P5 | 26.60                             | 27.01                  | 1.00             | 0.80                         |
| P4×P6 | 26.81                             | 26.94                  | 1.09             | 0.81                         |
| P4×P7 | 23.04                             | 23.29                  | 0.89             | 0.60                         |
| P4×P8 | 31.47                             | 31.54                  | 1.32             | 1.11                         |
| P5×P6 | 27.72                             | 27.80                  | 1.16             | 0.86                         |
| P5×P7 | 18.80                             | 18.94                  | 0.75             | 0.40                         |
| P5×P8 | 27.93                             | 28.36                  | 1.05             | 0.88                         |
| P6×P7 | 27.95                             | 27.97                  | 1.21             | 0.88                         |
| P6×P8 | 22.07                             | 22.47                  | 0.82             | 0.55                         |
| P7×P8 | 26.56                             | 26.70                  | 1.08             | 0.79                         |

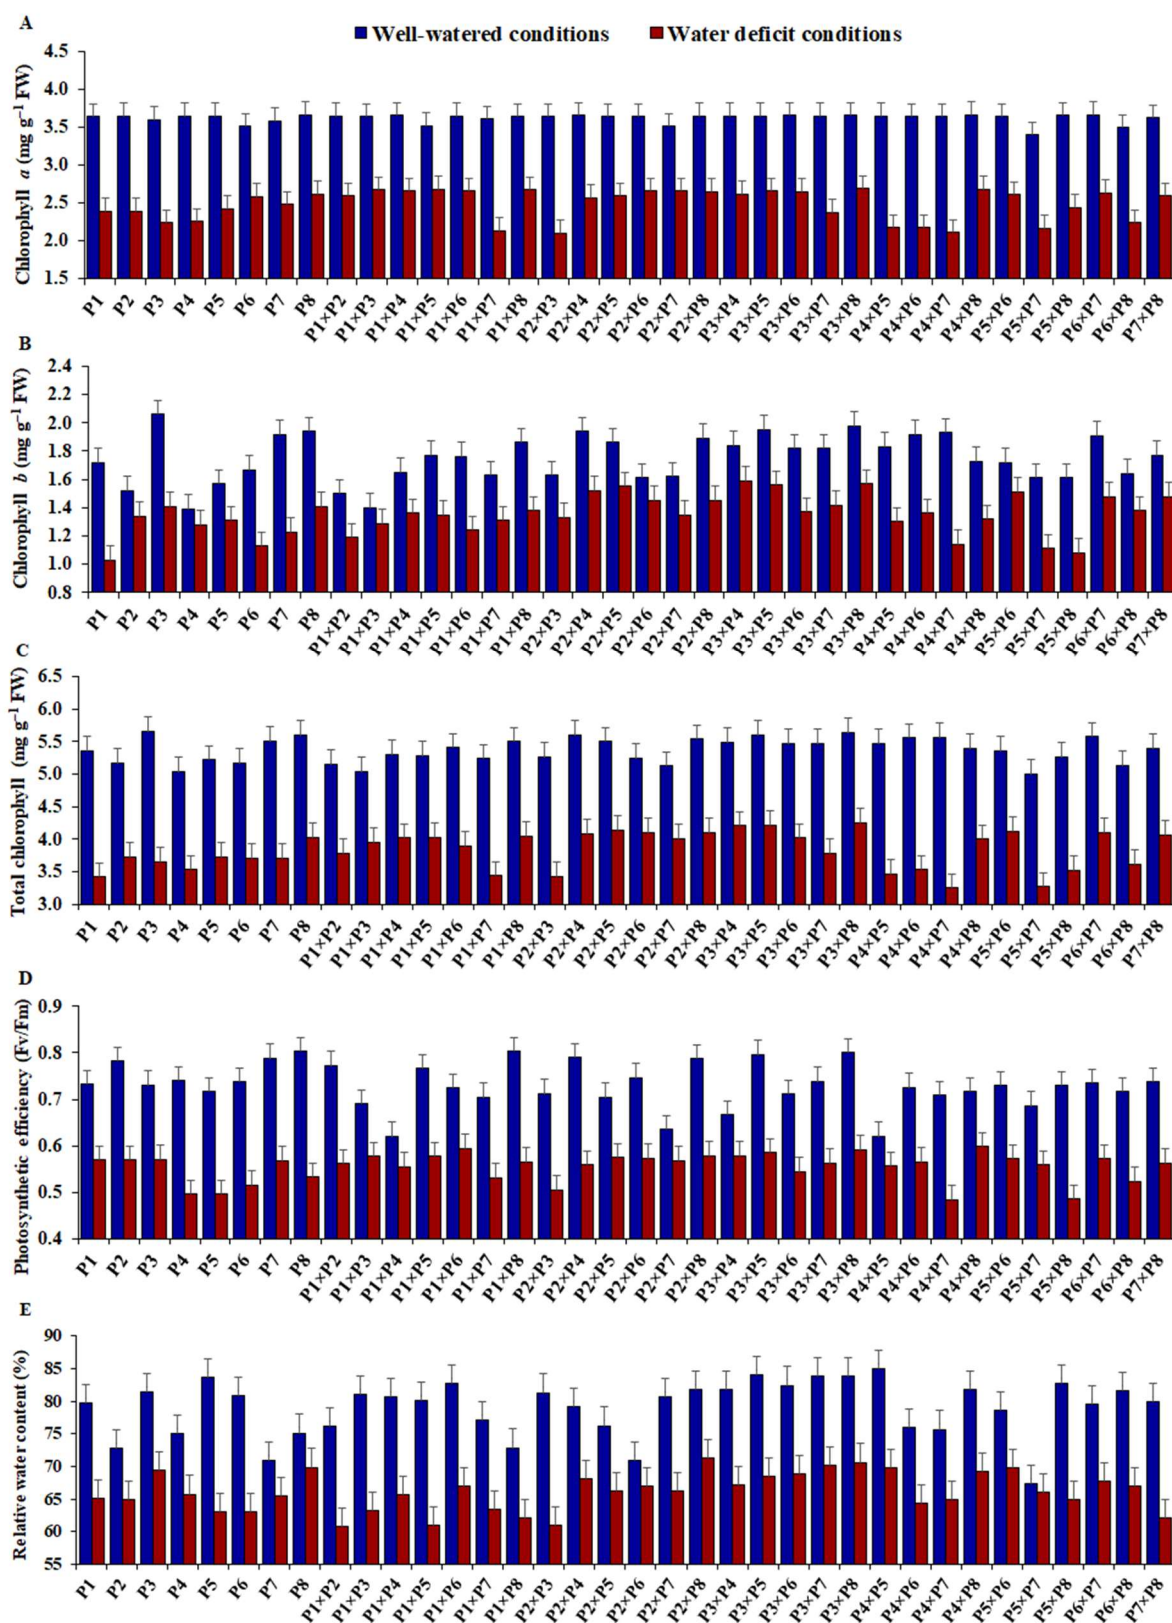

**Figure S1.** Mean performance of the thirty-six wheat genotypes for chlorophyll *a* (A), chlorophyll *b* (B), total chlorophyll content (C), photosynthetic efficiency (D), and relative water content (E). The bars on the columns represent LSD ( $p < 0.05$ ).

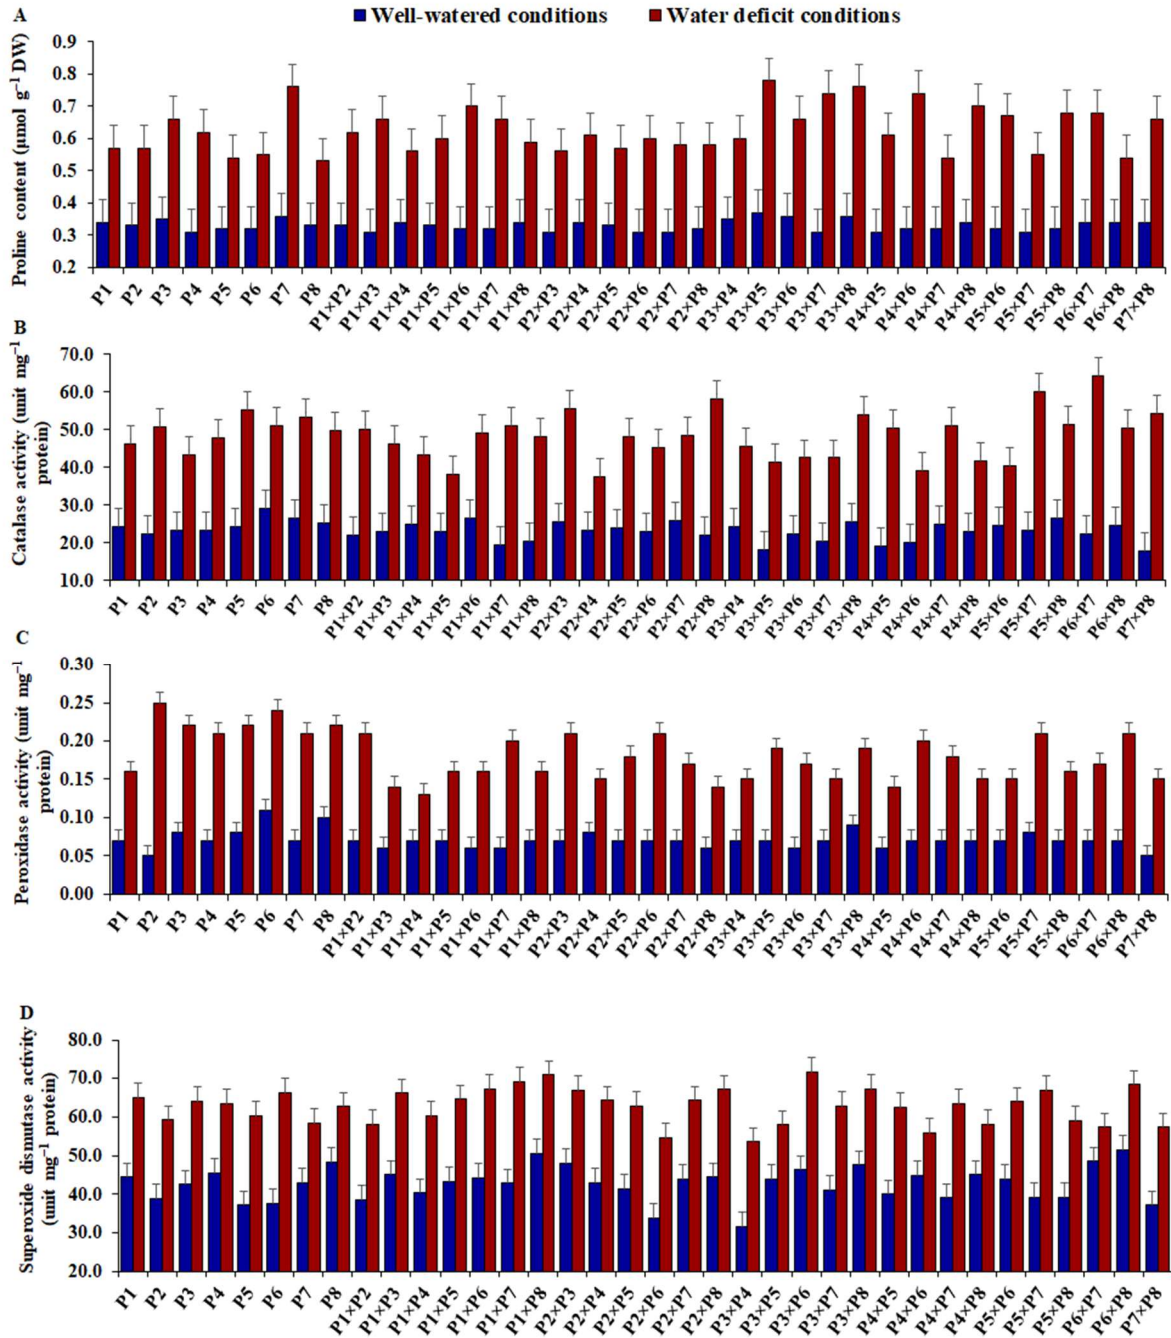

**Figure S2.** Mean performance of the thirty-six wheat genotypes for proline content (A), catalase activity (B), peroxidase activity (C), and superoxide dismutase activity (D). The bars on the columns represent LSD ( $p < 0.05$ ).

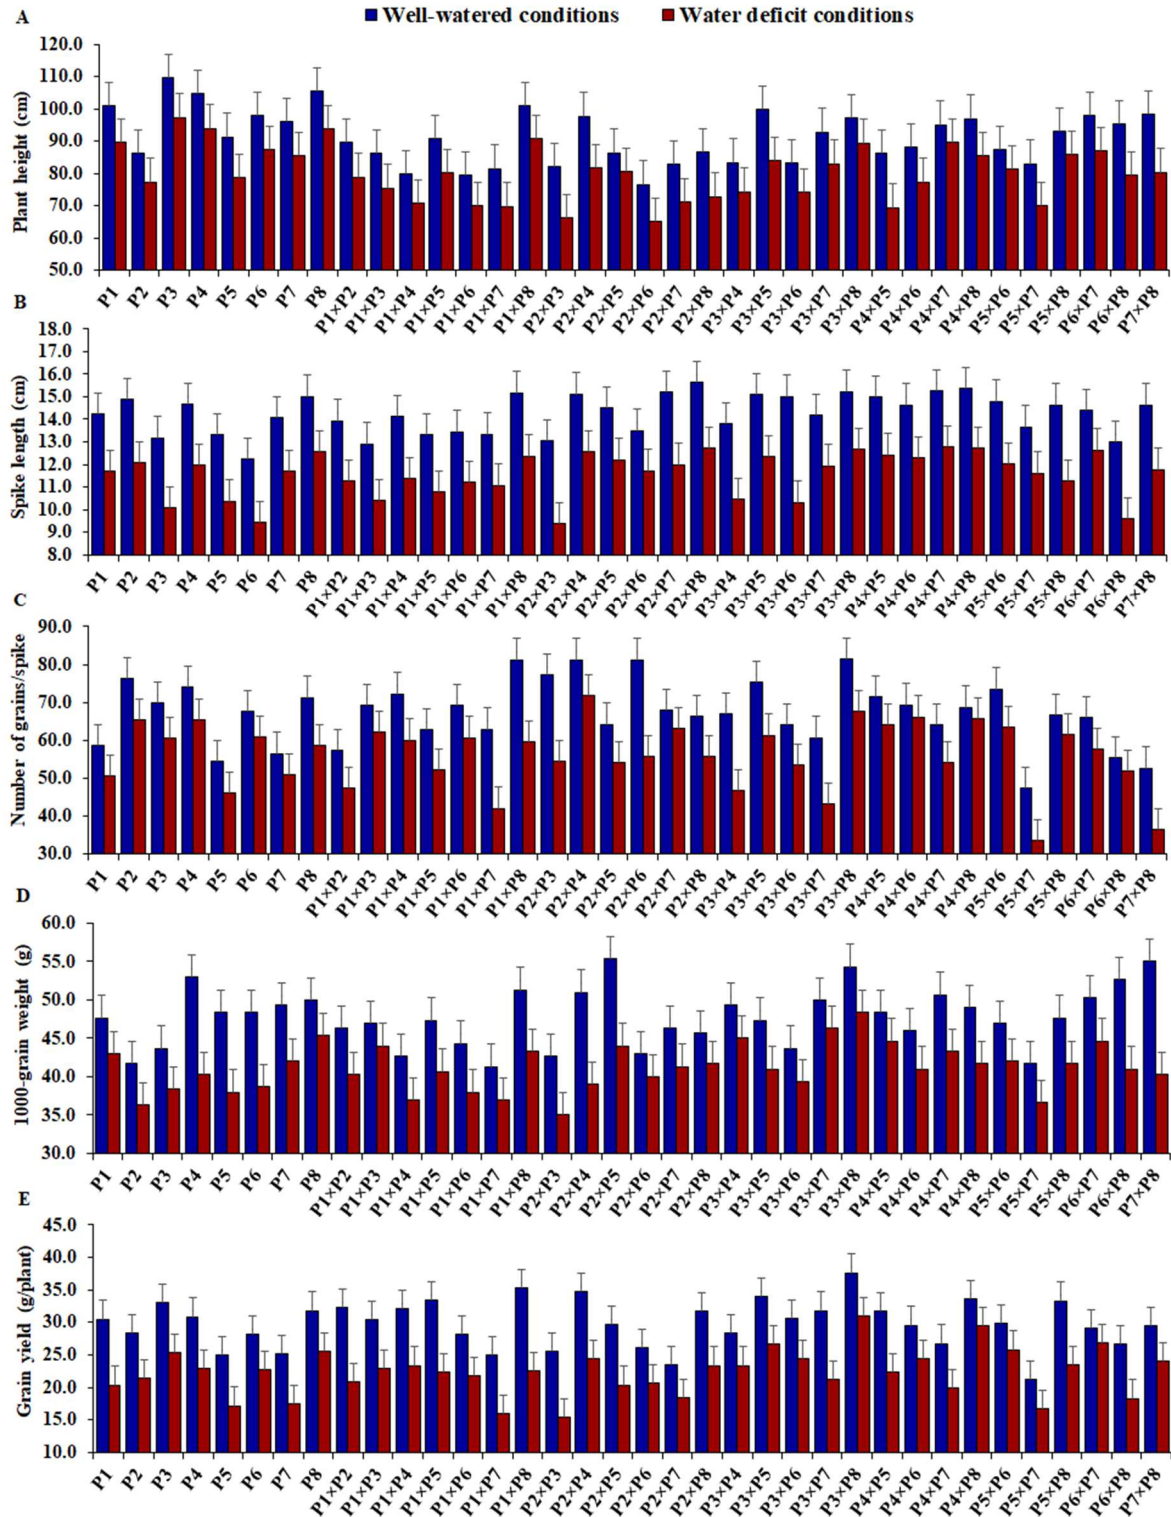

**Figure S3.** Mean performance of the thirty-six wheat genotypes for plant height (A), spike length (B), number of grains per spike (C), 1000-grain weight (D), and grain yield per plant (E). The bars on the columns represent LSD ( $p < 0.05$ ).

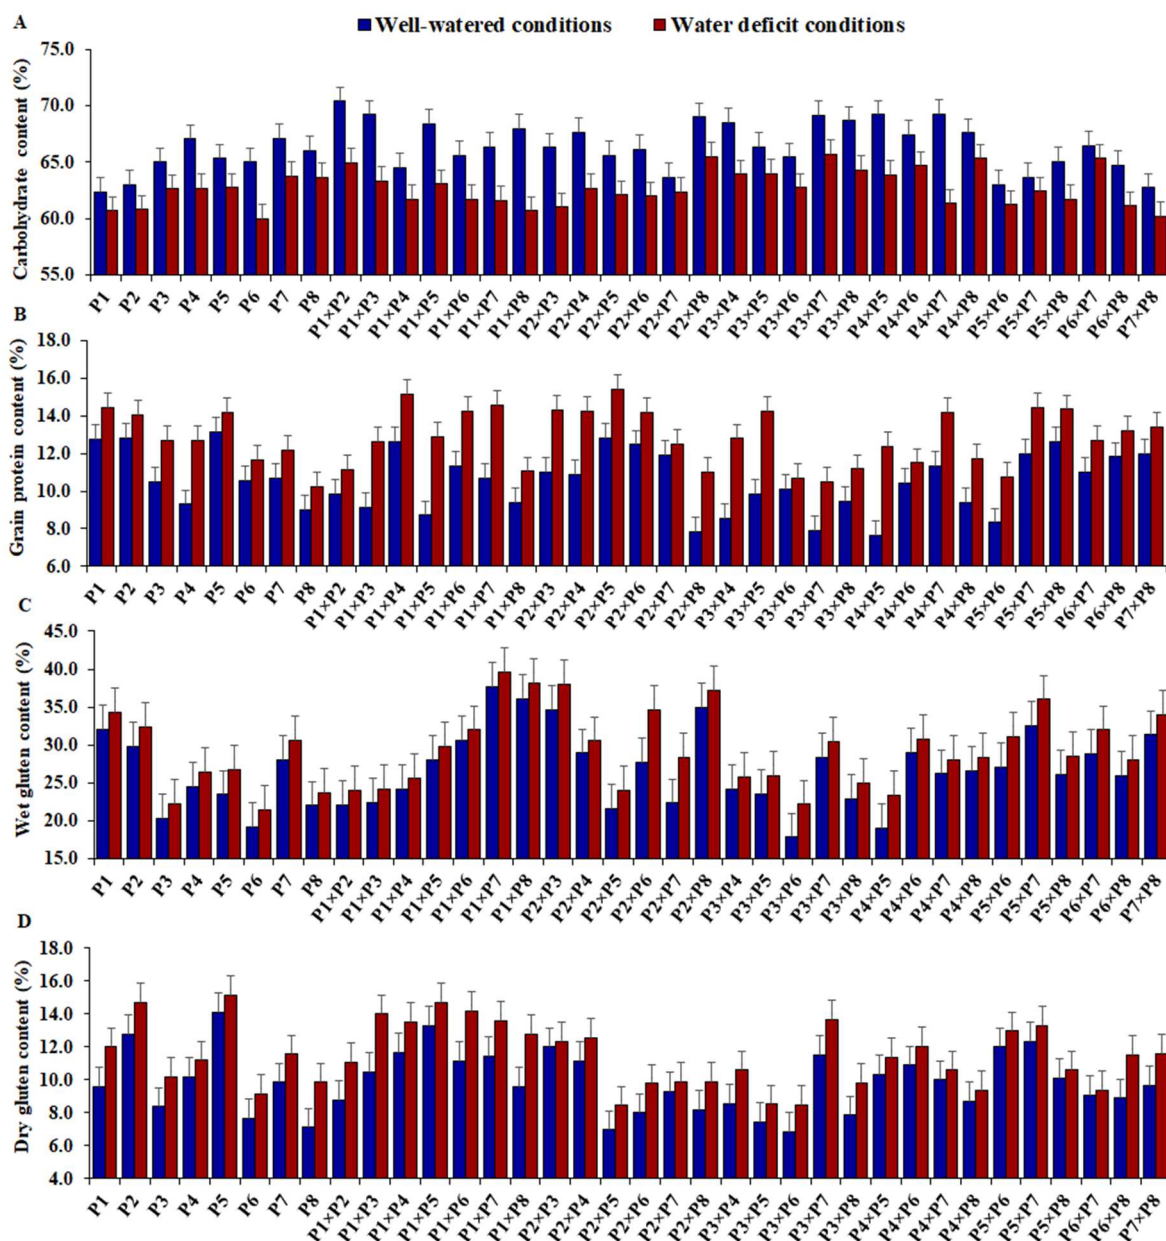

**Figure S4.** Mean performance of the thirty-six wheat genotypes for carbohydrate content (A), protein content (B), wet gluten content (C), and dry gluten content (D). The bars on the columns represent LSD ( $p < 0.05$ ).



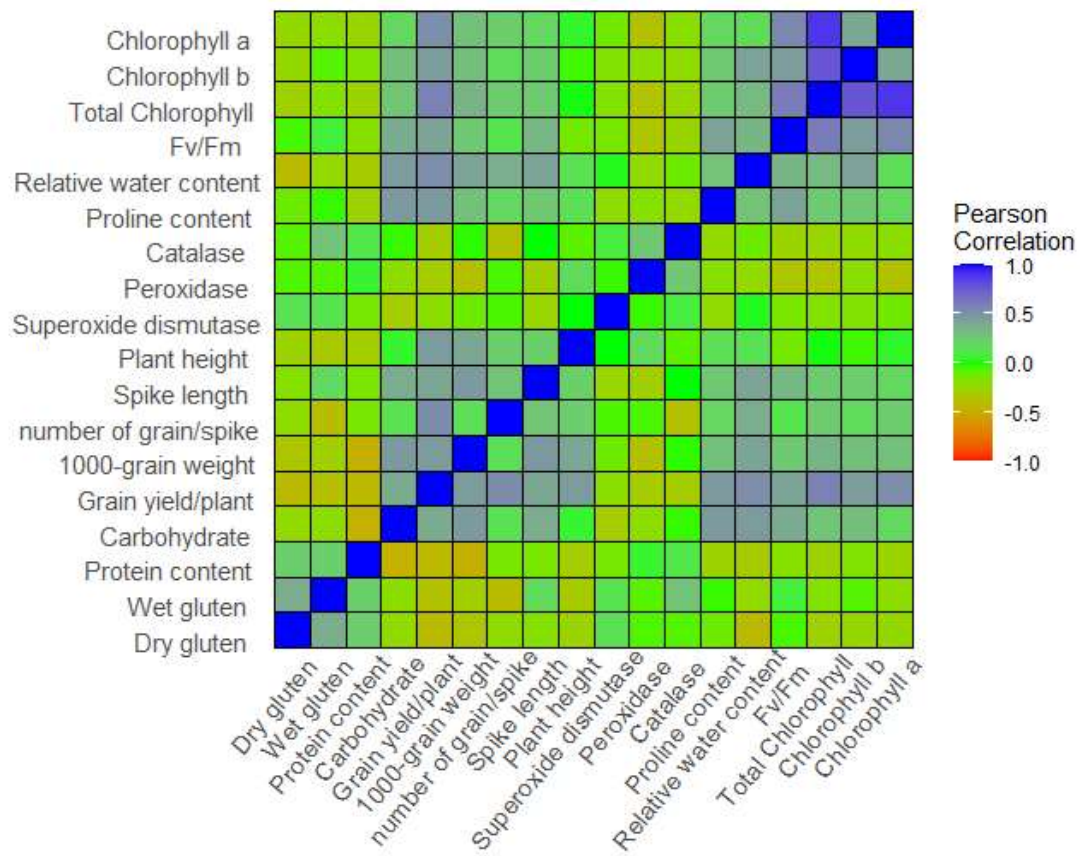

**Figure 5.** Correlation heatmap of the studied physiological, agronomic, and quality traits.
